# Supplementary material for: Au/graphene hydrogel: synthesis, characterization and its use for catalytic reduction of 4-nitrophenol
Source: Royal Society of Chemistry journal article supplement (doi:10.1039/c2jm16386a), 2012-01-01
Supplement: c2jm16386a.pdf [file c2jm16386a.pdf]

## Electronic Supplementary Information

### Au/graphene hydrogel: synthesis, characterization and its use for catalytic reduction of 4-nitrophenol

Jing Li<sup>a,b</sup>, Chun-yan Liu<sup>\*a</sup> and Yun Liu<sup>a</sup>

a Key Laboratory of Photochemical Conversion and Optoelectronic Materials of Technical  
Institute of Physics and Chemistry, Chinese Academy of Sciences, Zhongguancun, Beijing  
100190, PR China

b Graduate School of the Chinese Academy of Sciences, Beijing 100806, PR China

\*Corresponding author: [cylu@mail.ipc.ac.cn](mailto:cylu@mail.ipc.ac.cn)

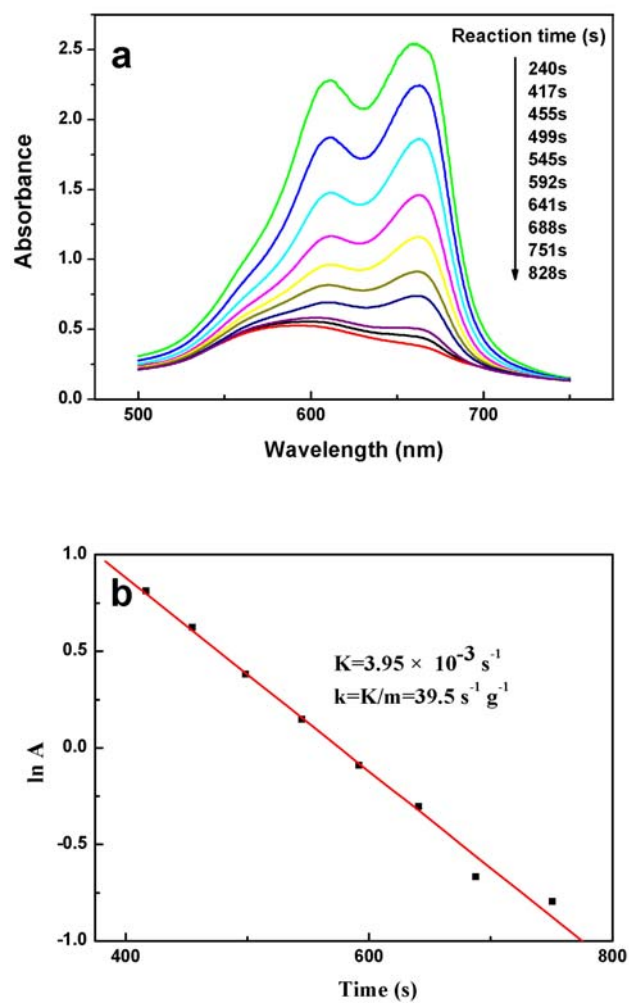

Fig. S1 (a) Successive UV-vis absorption spectra of the reduction of MB by  $\text{NaBH}_4$  in the presence of Au/graphene hydrogel and (b) The logarithm of the absorbance at 665 nm vs. reduction time
